# Supplementary material
Source: publisher figshare collection journal article supplement (https://karger.figshare.com/ndownloader/files/16971752)
Supplement: Supplementary file 1 [file 16971752]

## Sheet: Sheet1
										Initial enrollment
										n = 605
										Randomization												Consent withdrawn/ excluded n = 56
										n = 549												Premature birth n = 15
																						NICU admission n = 34
																						Referred n = 3
																						Unfamiliar with child rearing n = 1
	Synbiotics and skin care						Synbiotics only						Skin care only						No intervention			Mediastinal tumor n = 1
	n = 137						n = 137						n = 138						n = 137			Opposition of grandparents n = 1
																						Returned home early n = 1
	Synbiotics and skin care			Lost to follow-up (n = 24)			Synbiotics only			Lost to follow-up（n = 28）			Skin care only			Lost to follow-up（n = 18）			No intervention			Lost to follow-up（n = 20）
	n = 113 (Questionnaire at 1 year)			Anxious about adhering to protocol n = 2			n = 109 (Questionnaire at 1 year)			Difficulty in adhering to protocol n = 11			n = 120 (Questionnaire at 1 year)			Anxiety about adhering to protocol n = 3			n = 117 (Questionnaire at 1 year)			Difficulty in adhering to protocol n = 2
				Difficulty in adhering to protocol n = 9						Personal reasons n = 9						Difficulty in adhering to protocol n = 2						Personal reasons n = 14
				Participant event n = 3						Illness of infant n = 6						Personal reasons n = 9						Illness of infant n = 2
				Illness of infant n = 3						Cannot be contacted n = 2						Illness of infant n = 2						Cannot be contacted n = 2
				Cannot be contacted n = 7												Cannot be contacted n = 2
Online Supp. Fig S1. Participant numbers in each phase of the study.
